# Supplementary material
Source: ML conference proceedings conference paper supplement (https://proceedings.neurips.cc/paper_files/paper/2020/hash/01a0683665f38d8e5e567b3b15ca98bf-Abstract.html)
Supplement: Supplementary file [file 01a0683665f38d8e5e567b3b15ca98bf-Supplemental.pdf]

# Supplementary Materials for Cascaded Text Generation with Markov Transformers

## Appendix A: Cascaded Decoding Examples

We show a decoding example in Table 3 ( $K = 5, \Delta L = 1, \text{iters}=5$ ). We sort states by max-marginals in descending order and use - to denote invalid states (with  $-\infty$  log max-marginals). In this simple sentence, using 1 iteration ( $m = 0$ , non-autoregressive model) repeats the word “woman” ( $m = 0$ , first row,  $x_{4:4+m}$ ). Introducing higher order dependencies fixes this issue.

Table 3: Cascaded Decoding Example. When  $m = 4$ , Viterbi in  $\mathcal{X}_4$  returns “an amazing woman . eos”. The source is “eine erstaunliche frau . eos” and the target is “an amazing woman . eos”.

| $m$ | $x_{1:1+m}$            | $x_{2:2+m}$            | $x_{3:3+m}$         | $x_{4:4+m}$     | $x_{5:5+m}$     | $x_{6:6+m}$     | $x_{7:7+m}$     | $x_8$ |
|-----|------------------------|------------------------|---------------------|-----------------|-----------------|-----------------|-----------------|-------|
| 0   | an                     | amazing                | woman               | woman           | eos             | eos             | eos             | pad   |
|     | amazing                | woman                  | amazing             | .               | .               | pad             | pad             | -     |
|     | incredible             | an                     | an                  | amazing         | woman           | .               | .               | -     |
|     | this                   | remarkable             | .                   | eos             | amazing         | woman           | woman           | -     |
| 1   | remarkable             | incredible             | women               | an              | women           | women           | women           | -     |
|     | an amazing             | amazing woman          | woman .             | . eos           | eos pad         | pad pad         | pad pad         |       |
|     | an incredible          | incredible woman       | amazing woman       | woman .         | . eos           | eos pad         | eos pad         |       |
|     | 1 this amazing         | remarkable woman       | women .             | amazing woman   | woman .         | . eos           | -               | -     |
| 2   | an remarkable          | woman amazing          | woman woman         | .               | women .         | woman eos       | -               | -     |
|     | amazing woman          | amazing women          | an amazing          | . woman         | .               | -               | -               |       |
|     | an amazing woman       | amazing woman .        | woman . eos         | . eos pad       | eos pad pad     | pad pad pad     | eos pad pad     |       |
|     | an incredible woman    | incredible woman .     | women . eos         | woman . eos     | . eos pad       | eos pad pad     | eos pad pad     |       |
| 3   | 2 this amazing woman   | remarkable woman .     | woman woman .       | . . eos         | woman . eos     | . eos pad       | . eos pad       |       |
|     | an remarkable woman    | amazing women .        | woman . .           | . woman .       | . . eos         | -               | -               |       |
|     | an amazing women       | amazing woman woman    | woman . woman       | woman . .       | -               | -               | -               |       |
|     | an amazing woman .     | amazing woman . eos    | woman . eos pad     | . eos pad pad   | eos pad pad pad | pad pad pad     | pad pad         |       |
| 4   | an incredible woman .  | incredible woman . eos | women . eos pad     | woman . eos pad | eos pad pad     | eos pad pad     | eos pad pad     |       |
|     | 3 this amazing woman . | remarkable woman . eos | woman woman . eos . | . eos pad       | woman . eos pad | woman . eos pad | woman . eos pad |       |
|     | an remarkable woman .  | amazing women . eos    | woman . . eos       | . woman . eos   | . . eos pad     | -               | -               |       |
|     | an amazing women .     | amazing woman woman .  | woman . woman .     | woman . . eos   | -               | -               | -               |       |

Table 4: Cascaded Decoding Example. When  $m = 4$ , Viterbi in  $\mathcal{X}_4$  returns “what has happened ? eos”. The source is “was ist passiert ? eos” and the target is “what happened ? eos”.

| $m$ | $x_{1:1+m}$           | $x_{2:2+m}$         | $x_{3:3+m}$         | $x_{4:4+m}$        | $x_{5:5+m}$        | $x_{6:6+m}$        | $x_{7:7+m}$        | $x_8$ |
|-----|-----------------------|---------------------|---------------------|--------------------|--------------------|--------------------|--------------------|-------|
| 0   | what                  | happened            | happened            | ?                  | eos                | eos                | eos                | pad   |
|     | so                    | has                 | ?                   | eos                | ?                  | pad                | pad                | -     |
|     | now                   | did                 | what                | happened           | happened           | ?                  | ?                  | -     |
|     | and                   | what                | happen              | happen             | happen             | happened           | .                  | -     |
| 1   | well                  | 's                  | eos                 | happens            | happens            | .                  | happened           | -     |
|     | what has              | has happened        | happened ?          | ? eos              | eos pad            | pad pad            | pad pad            |       |
|     | so what               | what happened       | what happened       | happened ?         | ? eos              | eos pad            | eos pad            |       |
|     | 1 and what            | 's happened         | happen ?            | happens ?          | happens ?          | ? eos              | -                  | -     |
| 2   | what 's               | did what            | what ?              | happen ?           | happen ?           | . eos              | -                  | -     |
|     | now what              | did happened        | what happens        | ? ?                | happened ?         | happened eos       | -                  | -     |
|     | what has happened     | has happened ?      | happened ? eos      | ? eos pad          | eos pad pad        | pad pad pad        | pad pad pad        |       |
|     | so what happened      | what happened ?     | happened ? ?        | ? ? eos            | ? eos pad          | eos pad pad        | eos pad pad        |       |
| 3   | 2 what 's happened    | 's happened ?       | happen ? ?          | happen ? eos       | happened ? eos     | happened eos pad   | happened eos pad   |       |
|     | and what happened     | did what ?          | happen ? eos        | happens ? eos      | happen ? eos       | . eos pad          | . eos pad          |       |
|     | now what happened     | did what happened   | what happened ?     | happened ? eos     | happens ? eos      | ? eos pad          | ? eos pad          |       |
|     | what has happened ?   | has happened ? eos  | happened ? eos pad  | ? eos pad pad      | eos pad pad pad    | pad pad pad        | pad pad            |       |
| 4   | so what happened ?    | what happened ? eos | happened ? ? eos    | ? ? eos pad        | ? eos pad pad      | eos pad pad        | eos pad pad        |       |
|     | 3 and what happened ? | 's happened ? eos   | what happened ? eos | happened ? eos pad | happens ? eos pad  | happens ? eos pad  | happens ? eos pad  |       |
|     | what 's happened ?    | has happened ? ?    | happen ? eos pad    | happens ? eos pad  | happen ? eos pad   | happen ? eos pad   | happen ? eos pad   |       |
|     | now what happened ?   | what happened ? ?   | happen ? ? eos      | happen ? eos pad   | happened ? eos pad | happened ? eos pad | happened ? eos pad |       |

In Tables 4, 5, 6, 7, 8 we show more examples from IWSLT14 De-En val.

Table 5: Cascaded Decoding Example. When  $m = 4$ , Viterbi in  $\mathcal{X}_4$  returns “you ’re happy . eos”. The source is “du bist glücklich . eos” and the target is “you ’re happy . eos”.

| $m$ | $x_{1:1+m}$     | $x_{2:2+m}$     | $x_{3:3+m}$       | $x_{4:4+m}$     | $x_{5:5+m}$     | $x_{6:6+m}$   | $x_{7:7+m}$ | $x_8$ |
|-----|-----------------|-----------------|-------------------|-----------------|-----------------|---------------|-------------|-------|
|     | you             | 're             | happy             | .               | eos             | eos           | eos         | pad   |
|     | happy           | are             | lucky             | eos             | .               | pad           | pad         | -     |
| 0   | your            | you             | gla@@             | happy           | happy           | .             | .           | -     |
|     | and             | 's              | good              | lucky           | ?               | happy         | happy       | -     |
|     | i               | be              | fortun@@          | ful             | you             | ?             | ?           | -     |
|     | you 're         | 're happy       | happy .           | . eos           | eos pad         | pad pad       | pad pad     |       |
|     | you are         | are happy       | lucky .           | ..              | . eos           | eos pad       | eos pad     |       |
| 1   | you be          | are lucky       | good .            | happy .         | happy .         | . eos         | -           |       |
|     | you 's          | be happy        | happy happy       | ful .           | ? eos           | ? eos         | -           |       |
|     | and you         | 're lucky       | happy ful         | lucky .         | you .           | happy eos     | -           |       |
|     | you 're happy   | 're happy .     | happy . eos       | . eos pad       | eos pad pad     | pad pad pad   |             |       |
|     | you are happy   | are happy .     | lucky . eos       | .. eos          | . eos pad       | eos pad pad   |             |       |
| 2   | you be happy    | be happy .      | happy . .         | happy . eos     | you . eos       | happy eos pad |             |       |
|     | you 're lucky   | 're lucky .     | happy happy .     | ful . eos       | ? eos pad       | ? eos pad     |             |       |
|     | you are lucky   | are lucky .     | happy ful .       | lucky . eos     | happy . eos     | . eos pad     |             |       |
|     | you 're happy . | 're happy . eos | happy . eos pad   | . eos pad pad   | eos pad pad pad |               |             |       |
|     | you are happy . | are happy . eos | lucky . eos pad   | .. eos pad      | . eos pad pad   |               |             |       |
| 3   | you be happy .  | be happy . eos  | happy . . eos     | lucky . eos pad | happy . eos pad |               |             |       |
|     | you 're lucky . | 're lucky . eos | happy ful . eos   | ful . eos pad   | ? eos pad pad   |               |             |       |
|     | you are lucky . | are lucky . eos | happy happy . eos | happy . eos pad | you . eos pad   |               |             |       |

Table 6: Cascaded Decoding Example. When  $m = 4$ , Viterbi in  $\mathcal{X}_4$  returns “let ’s move . eos”. The source is “bewe@@ g dich . eos” and the target is “move it . eos”.

| $m$ | $x_{1:1+m}$         | $x_{2:2+m}$       | $x_{3:3+m}$        | $x_{4:4+m}$       | $x_{5:5+m}$     | $x_{6:6+m}$ | $x_{7:7+m}$ | $x_8$ |
|-----|---------------------|-------------------|--------------------|-------------------|-----------------|-------------|-------------|-------|
|     | move                | move              | .                  | eos               | eos             | eos         | eos         | pad   |
|     | let                 | .                 | eos                | .                 | .               | pad         | pad         | -     |
| 0   | so                  | moving            | move               | ?                 | ?               | .           | .           | -     |
|     | just                | 's                | forward            | forward           | here            | ?           | ?           | -     |
|     | now                 | let               | moving             | it                | forward         | here        | here        | -     |
|     | let 's              | 's move           | move .             | . eos             | eos pad         | pad pad     | pad pad     |       |
|     | just move           | 's moving         | moving .           | it .              | . eos           | eos pad     | eos pad     |       |
| 1   | so move             | move forward      | move it            | forward .         | here .          | . eos       | -           |       |
|     | move .              | . forward         | move forward       | ? eos             | ? eos           | ? eos       | -           |       |
|     | move 's             | . moving          | move ?             | ..                | forward .       | -           | -           |       |
|     | let 's move         | 's move .         | move . eos         | . eos pad         | eos pad pad     | pad pad pad |             |       |
|     | let 's moving       | 's move it        | move it .          | it . eos          | . eos pad       | eos pad pad |             |       |
| 2   | move 's move        | 's move forward   | move forward .     | forward . eos     | ? eos pad       | ? eos pad   |             |       |
|     | move . moving       | 's moving .       | moving . eos       | ? eos pad         | here . eos      | . eos pad   |             |       |
|     | move 's moving      | 's move ?         | move ? eos         | .. eos            | -               | -           |             |       |
|     | let 's move .       | 's move . eos     | move . eos pad     | . eos pad pad     | eos pad pad pad |             |             |       |
|     | let 's move it      | 's move it .      | move it . eos      | it . eos pad      | . eos pad pad   |             |             |       |
| 3   | let 's moving .     | 's moving . eos   | moving . eos pad   | forward . eos pad | here . eos pad  |             |             |       |
|     | let 's move forward | 's move forward . | move forward . eos | ? eos pad pad     | ? eos pad pad   |             |             |       |
|     | let 's move ?       | 's move ? eos     | move ? eos pad     | .. eos pad        | -               |             |             |       |

Table 7: Cascaded Decoding Example. When  $m = 4$ , Viterbi in  $\mathcal{X}_4$  returns “very , very hard . eos”. The source is “sehr sehr schwer . eos” and the target is “very very hard . eos”.

| $m$ | $x_{1:1+m}$           | $x_{2:2+m}$          | $x_{3:3+m}$          | $x_{4:4+m}$           | $x_{5:5+m}$         | $x_{6:6+m}$       | $x_{7:7+m}$ | $x_8$ |
|-----|-----------------------|----------------------|----------------------|-----------------------|---------------------|-------------------|-------------|-------|
| 0   | very                  | difficult            | difficult            | .                     | eos                 | eos               | eos         | pad   |
|     | it                    | hard                 | hard                 | eos                   | .                   | pad               | pad         | -     |
|     | really                | very                 | .                    | difficult             | difficult           | .                 | .           | -     |
|     | extremely             | tough                | very                 | hard                  | hard                | difficult         | difficult   | -     |
|     | that                  | ,                    | tough                | very                  | very                | hard              | hard        | -     |
| 1   | very ,                | , very               | very difficult       | difficult .           | . eos               | eos pad           | pad pad     |       |
|     | very very             | very hard            | very hard            | hard .                | eos pad             | pad pad           | eos pad     |       |
|     | really ,              | very difficult       | hard .               | . eos                 | difficult .         | . eos             | -           |       |
|     | it very               | , hard               | difficult .          | hard eos              | hard .              | difficult eos     | -           |       |
|     | extremely ,           | , difficult          | tough .              | difficult eos         | .                   | hard eos          | -           |       |
| 2   | very , very           | , very hard          | very hard .          | hard . eos            | . eos pad           | eos pad pad       |             |       |
|     | very very difficult   | , very difficult     | very difficult .     | difficult . eos       | eos pad pad         | pad pad pad       |             |       |
|     | very very hard        | very difficult .     | difficult . eos      | . eos pad             | . . eos             | . eos pad         |             |       |
|     | really , very         | very hard .          | hard . eos           | hard eos pad          | hard . eos          | hard eos pad      |             |       |
|     | it very difficult     | , hard .             | very hard eos        | difficult eos pad     | difficult . eos     | difficult eos pad |             |       |
| 3   | very , very hard      | , very hard .        | very hard . eos      | hard . eos pad        | . eos pad pad       |                   |             |       |
|     | very , very difficult | , very difficult .   | very difficult . eos | difficult . eos pad   | eos pad pad pad     |                   |             |       |
|     | very very difficult . | very difficult . eos | difficult . eos pad  | . eos pad pad         | difficult . eos pad |                   |             |       |
|     | very very hard .      | very hard . eos      | hard . eos pad       | hard eos pad pad      | hard . eos pad      |                   |             |       |
|     | really , very hard    | , very hard eos      | very hard eos pad    | difficult eos pad pad | . . eos pad         |                   |             |       |

Table 8: Cascaded Decoding Example. When  $m = 4$ , Viterbi in  $\mathcal{X}_4$  returns “the opposite thing happened . eos”. The source is “das Gegenteil passierte . eos” and the target is “the opposite happened . eos”.

| $m$ | $x_{1:1+m}$                 | $x_{2:2+m}$                  | $x_{3:3+m}$             | $x_{4:4+m}$         | $x_{5:5+m}$         | $x_{6:6+m}$      | $x_{7:7+m}$ | $x_8$ |
|-----|-----------------------------|------------------------------|-------------------------|---------------------|---------------------|------------------|-------------|-------|
| 0   | the                         | opposite                     | opposite                | happened            | eos                 | eos              | eos         | pad   |
|     | and                         | contr@@                      | thing                   | was                 | .                   | pad              | pad         | -     |
|     | so                          | other                        | ary                     | thing               | happened            | .                | .           | -     |
|     | but                         | the                          | happened                | did                 | happening           | happened         | happened    | -     |
|     | well                        | conver@@                     | was                     | opposite            | happen              | happen           | happen      | -     |
| 1   | the opposite                | opposite thing               | thing happened          | happened .          | . eos               | eos pad          | pad pad     |       |
|     | the contr@@                 | contr@@ ary                  | ary happened            | was happening       | happening .         | . eos            | eos pad     |       |
|     | and the                     | the opposite                 | opposite happened       | thing happened      | happened .          | pad pad          | -           |       |
|     | the other                   | other thing                  | thing was               | did .               | eos pad             | . happened eos   | -           |       |
|     | so the                      | opposite opposite            | was happened            | was happened        | . .                 | -                | -           |       |
| 2   | the opposite thing          | opposite thing happened      | thing happened .        | happened . eos      | . eos pad           | eos pad pad      |             |       |
|     | the contr@@ ary             | contr@@ ary happened         | ary happened .          | was happening .     | happening . eos     | . eos pad        |             |       |
|     | and the opposite            | the opposite happened        | opposite happened .     | was happened .      | happened . eos      | happened eos pad |             |       |
|     | the other thing             | other thing happened         | thing was happening     | happened . .        | . . eos             | pad pad pad      |             |       |
|     | so the opposite             | opposite thing was           | thing was happened      | thing happened .    | -                   | -                |             |       |
| 3   | the opposite thing happened | opposite thing happened .    | thing happened . eos    | happened . eos pad  | . eos pad pad       |                  |             |       |
|     | the contr@@ ary happened    | contr@@ ary happened .       | ary happened . eos      | was happening . eos | happening . eos pad |                  |             |       |
|     | and the opposite happened   | the opposite happened .      | opposite happened . eos | was happened . eos  | happened . eos pad  |                  |             |       |
|     | the other thing happened    | other thing happened .       | thing was happening .   | happened . . eos    | . . eos pad         |                  |             |       |
|     | the opposite thing was      | opposite thing was happening | thing was happened .    | -                   | -                   |                  |             |       |

## Appendix B: More Visualizations

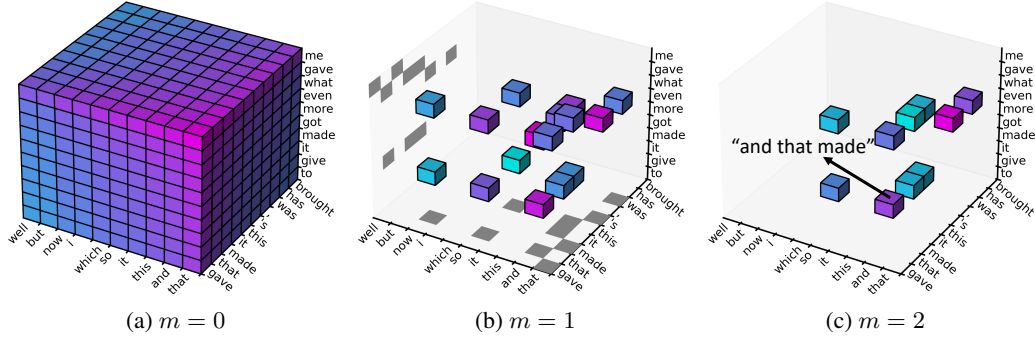

Figure 4: Illustration of cascaded decoding ( $K = 10$ , iters=4) for  $\mathcal{X}_1, \mathcal{X}_2, \mathcal{X}_3$ .

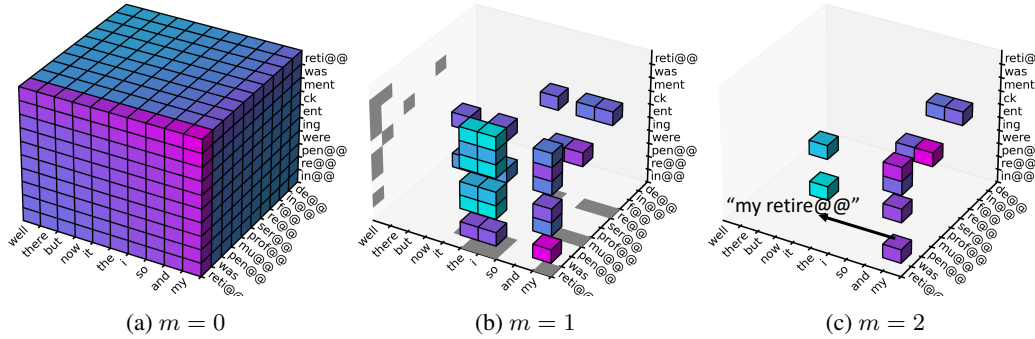

Figure 5: Illustration of cascaded decoding ( $K = 10$ , iters=4) for  $\mathcal{X}_1, \mathcal{X}_2, \mathcal{X}_3$ .

We include more visualizations of  $\mathcal{X}_1, \mathcal{X}_2$  and  $\mathcal{X}_3$  in Figure 4 and Figure 5. These examples are taken from IWSLT14 De-En val.

## Appendix C: Variable Length Generation Potentials

To handle length, we introduce an additional padding symbol  $\text{pad}$  to  $\mathcal{V}$ , and change the log potentials to enforce the considered candidates are of length  $L - \Delta L$  to  $L + \Delta L$ . Note that we can only enforce that for  $m \geq 1$ , and for  $m = 0$  we manually add  $\text{pad}$  to the pruned vocabulary.

We start cascaded search using a sequence of length  $L + \Delta L + 1$ . The main ideas are: 1) We make  $\text{eos}$  and  $\text{pad}$  to always transition to  $\text{pad}$  such that sequences of different lengths can be compared; 2) We disallow  $\text{eos}$  to appear too early or too late to satisfy the length constraint; 3) We force the last token to be  $\text{pad}$  such that we don't end up with sentences without  $\text{eos}$  endings. Putting these ideas together, the modified log potentials we use are:

$$f'_l^{(m)}(x_{l:l+m}) = \begin{cases} 0, & \text{if } x_{l+m-1} = \text{eos} \wedge x_{l+m} = \text{pad} \\ -\infty, & \text{if } x_{l+m-1} = \text{eos} \wedge x_{l+m} \neq \text{pad} \text{ (eos} \rightarrow \text{pad)} \\ 0, & \text{if } x_{l+m-1} = \text{pad} \wedge x_{l+m} = \text{pad} \\ -\infty, & \text{if } x_{l+m-1} = \text{pad} \wedge x_{l+m} \neq \text{pad} \text{ (pad} \rightarrow \text{pad)} \\ -\infty, & \text{if } x_{l+m-1} \neq \text{pad} \wedge x_{l+m-1} \neq \text{eos} \wedge x_{l+m} = \text{pad} \text{ (nothing else} \rightarrow \text{pad)} \\ -\infty, & \text{if } l+m < L - \Delta L \wedge x_{l+m} = \text{eos} \text{ (eos cannot appear too early)} \\ 0, & \text{if } l+m = L + \Delta L + 1 \text{ and } x_{l+m} = \text{pad} \\ -\infty, & \text{if } l+m = L + \Delta L + 1 \text{ and } x_{l+m} \neq \text{pad} \text{ (the last token must be pad)} \\ f_l^{(m)}(x_{l:l+m}), & \text{o.t.} \end{cases} .$$

Note that we only considered a single sentence above, but batching is straightforward to implement and we refer interested readers to our code<sup>5</sup> for batch implementations.

## Appendix D: Full Results

In the main experiment table we showed latency/speedup results for WMT14 En-De. In Table 9, Table 10, Table 11 and Table 12 we show the latency/speedup results for other datasets. Same as in the main experiment table, we use the validation set to choose the configuration with the best BLEU score under speedup  $> \times 1$ ,  $> \times 2$ , etc.

Table 9: Results on WMT14 De-En.

| Model                                   | Settings         | Latency (Speedup)          | BLEU  |
|-----------------------------------------|------------------|----------------------------|-------|
| Transformer                             | (beam 5)         | 294.64ms ( $\times 1.00$ ) | 31.49 |
| <b>With Distillation</b>                |                  |                            |       |
| <i>Cascaded Generation with Speedup</i> |                  |                            |       |
| $> \times 7$                            | (K=16, iters=2)  | 43.41ms ( $\times 6.79$ )  | 30.69 |
| $> \times 6$                            | (K=32, iters=2)  | 52.06ms ( $\times 5.66$ )  | 30.72 |
| $> \times 5$                            | (K=16, iters=3)  | 62.06ms ( $\times 4.75$ )  | 30.96 |
| $> \times 4/3$                          | (K=32, iters=3)  | 79.01ms ( $\times 3.73$ )  | 31.08 |
| $> \times 2/1$                          | (K=32, iters=5)  | 129.67ms ( $\times 2.27$ ) | 31.15 |
| <b>Without Distillation</b>             |                  |                            |       |
| <i>Cascaded Generation with Speedup</i> |                  |                            |       |
| $> \times 6/5$                          | (K=32, iters=2)  | 53.83ms ( $\times 5.47$ )  | 27.56 |
| $> \times 4$                            | (K=32, iters=3)  | 81.10ms ( $\times 3.63$ )  | 28.64 |
| $> \times 3$                            | (K=32, iters=4)  | 106.97ms ( $\times 2.75$ ) | 28.73 |
| $> \times 2$                            | (K=64, iters=4)  | 154.15ms ( $\times 1.91$ ) | 29.43 |
| $> \times 1$                            | (K=128, iters=4) | 269.59ms ( $\times 1.09$ ) | 29.66 |

<sup>5</sup><https://github.com/harvardnlp/cascaded-generation>

Table 10: Results on WMT16 En-Ro.

| Model                                   | Settings         | Latency (Speedup)          | BLEU  |
|-----------------------------------------|------------------|----------------------------|-------|
| Transformer                             | (beam 5)         | 343.28ms ( $\times 1.00$ ) | 33.89 |
| <b>With Distillation</b>                |                  |                            |       |
| Cascaded Generation <i>with Speedup</i> |                  |                            |       |
| > $\times 7$                            | (K=16, iters=2)  | 49.38ms ( $\times 6.95$ )  | 32.70 |
| > $\times 6$                            | (K=32, iters=2)  | 54.56ms ( $\times 6.29$ )  | 32.73 |
| > $\times 5$                            | (K=16, iters=3)  | 66.33ms ( $\times 5.18$ )  | 32.89 |
| > $\times 4$                            | (K=32, iters=3)  | 77.39ms ( $\times 4.44$ )  | 33.16 |
| > $\times 3$                            | (K=64, iters=3)  | 108.57ms ( $\times 3.16$ ) | 33.23 |
| > $\times 2$                            | (K=64, iters=4)  | 142.23ms ( $\times 2.41$ ) | 33.30 |
| > $\times 1$                            | (K=64, iters=5)  | 179.07ms ( $\times 1.92$ ) | 33.23 |
| <b>Without Distillation</b>             |                  |                            |       |
| Cascaded Generation <i>with Speedup</i> |                  |                            |       |
| > $\times 7$                            | (K=16, iters=2)  | 45.18ms ( $\times 7.60$ )  | 32.11 |
| > $\times 6$                            | (K=32, iters=2)  | 51.38ms ( $\times 6.68$ )  | 32.62 |
| > $\times 5$                            | (K=16, iters=3)  | 60.34ms ( $\times 5.69$ )  | 32.67 |
| > $\times 4$                            | (K=32, iters=3)  | 73.99ms ( $\times 4.64$ )  | 33.12 |
| > $\times 3$                            | (K=64, iters=3)  | 105.46ms ( $\times 3.26$ ) | 33.48 |
| > $\times 2$                            | (K=64, iters=4)  | 145.18ms ( $\times 2.36$ ) | 33.64 |
| > $\times 1$                            | (K=128, iters=5) | 325.42ms ( $\times 1.05$ ) | 33.52 |

Table 11: Results on WMT16 Ro-En.

| Model                                   | Settings         | Latency (Speedup)          | BLEU  |
|-----------------------------------------|------------------|----------------------------|-------|
| Transformer                             | (beam 5)         | 318.57ms ( $\times 1.00$ ) | 33.82 |
| <b>With Distillation</b>                |                  |                            |       |
| Cascaded Generation <i>with Speedup</i> |                  |                            |       |
| > $\times 6/5$                          | (K=16, iters=2)  | 46.84ms ( $\times 6.80$ )  | 32.66 |
| > $\times 4$                            | (K=16, iters=3)  | 62.57ms ( $\times 5.09$ )  | 33.00 |
| > $\times 3$                            | (K=16, iters=5)  | 99.25ms ( $\times 3.21$ )  | 33.04 |
| > $\times 2$                            | (K=64, iters=3)  | 103.85ms ( $\times 3.07$ ) | 33.17 |
| > $\times 1$                            | (K=64, iters=5)  | 181.18ms ( $\times 1.76$ ) | 33.28 |
| <b>Without Distillation</b>             |                  |                            |       |
| Cascaded Generation <i>with Speedup</i> |                  |                            |       |
| > $\times 6$                            | (K=16, iters=2)  | 47.58ms ( $\times 6.70$ )  | 32.53 |
| > $\times 5$                            | (K=32, iters=2)  | 54.05ms ( $\times 5.89$ )  | 32.44 |
| > $\times 4$                            | (K=16, iters=3)  | 60.94ms ( $\times 5.23$ )  | 33.00 |
| > $\times 3$                            | (K=32, iters=4)  | 100.29ms ( $\times 3.18$ ) | 33.10 |
| > $\times 2$                            | (K=64, iters=3)  | 105.21ms ( $\times 3.03$ ) | 33.22 |
| > $\times 1$                            | (K=128, iters=4) | 282.76ms ( $\times 1.13$ ) | 33.29 |

Table 12: Results on IWSLT14 De-En.

| Model                                   | Settings         | Latency (Speedup)          | BLEU  |
|-----------------------------------------|------------------|----------------------------|-------|
| Transformer                             | (beam 5)         | 229.76ms ( $\times 1.00$ ) | 34.44 |
| <b>With Distillation</b>                |                  |                            |       |
| Cascaded Generation <i>with Speedup</i> |                  |                            |       |
| $> \times 6/5$                          | (K=16, iters=2)  | 39.38ms ( $\times 5.83$ )  | 33.90 |
| $> \times 4$                            | (K=32, iters=3)  | 60.27ms ( $\times 3.81$ )  | 34.33 |
| $> \times 3$                            | (K=32, iters=4)  | 78.27ms ( $\times 2.94$ )  | 34.43 |
| $> \times 2/1$                          | (K=64, iters=5)  | 117.90ms ( $\times 1.95$ ) | 34.49 |
| <b>Without Distillation</b>             |                  |                            |       |
| Cascaded Generation <i>with Speedup</i> |                  |                            |       |
| $> \times 5$                            | (K=64, iters=2)  | 48.59ms ( $\times 4.73$ )  | 33.25 |
| $> \times 4$                            | (K=32, iters=3)  | 60.09ms ( $\times 3.82$ )  | 33.74 |
| $> \times 3$                            | (K=64, iters=3)  | 75.64ms ( $\times 3.04$ )  | 33.96 |
| $> \times 2$                            | (K=64, iters=5)  | 121.95ms ( $\times 1.88$ ) | 34.08 |
| $> \times 1$                            | (K=128, iters=5) | 189.10ms ( $\times 1.22$ ) | 34.15 |

## Appendix E: Optimization Settings

Table 13: Optimization settings. We use the same settings for knowledge distillation experiments.

| Dataset           | dropout | fp16 | GPUs | batch | accum | warmup steps | max steps | max lr | weight decay |
|-------------------|---------|------|------|-------|-------|--------------|-----------|--------|--------------|
| WMT14 En-De/De-En | 0.1     | Y    | 3    | 4096  | 3     | 4k           | 240k      | 7e-4   | 0            |
| WMT16 En-Ro/Ro-En | 0.3     | Y    | 3    | 5461  | 1     | 10k          | 240k      | 7e-4   | 1e-2         |
| IWSLT14 De-En     | 0.3     | N    | 1    | 4096  | 1     | 4k           | 120k      | 5e-4   | 1e-4         |

Our approach is implemented in PyTorch [35], and we use 16GB Nvidia V100 GPUs for training. We used Adam optimizer [20], with betas 0.9 and 0.98. We use inverse square root learning rate decay after warmup steps [34]. We train with label smoothing strength 0.1 [32]. For model selection, we used BLEU score on validation set. For Markov transformers, we use cascaded decoding with  $K = 16$  and  $\Delta L = 3$  to compute validation BLEU score. Other hyperparameters can be found at Table 13.
